# Supplementary material
Source: Springer Nature journal article supplement (https://www.springermedizin.de/resource/supplementary/12889_2008_1379_MOESM4_ESM.pdf/9503078)
Supplement: MOESM4 [file 9503078]

>3000 Applicants Assessed for Eligibility

1492 Rejected by Lender's Criteria

705 "Egregious" Rejects

787 "Marginally Rejected" Applicants

325 Applicants Randomly Assigned to Receive "Second Look" for Loan Eligibility  
**Treatment Group**

462 Applicants Randomly Assigned to Receive No "Second Look"  
**Control Group**

172 of the 325 Treatment Group Members Receive Intervention (Small Individual Loan) within 6 to 12 month timeframe

7 of the 462 Control Group Members Receive Intervention (Small Individual Loan) within 6 to 12 month timeframe

**Household Survey**  
n=259 Adults

**Household Survey**  
n=367 Adults

**Complete Mental Health Data**  
n=109 Adults

**Complete Mental Health Data**  
n=128 Adults

**Complete Mental Health Data and Did Not Receive Loan**  
n=41 Adults

**Complete Mental Health Data and Did Not Receive Loan**  
n=125 Adults

**Complete Mental Health Data and Received Loan**  
n=68 Adults

**Complete Mental Health Data and Received Loan**  
n=3 Adults
